# Supplementary material for: Methionine deprivation suppresses triple-negative breast cancer metastasis in vitro and in vivo
Source: PubMed Central journal article supplement (PMC5341870; doi:10.18632/oncotarget.11615), 2016-08-25
Supplement: oncotarget-07-67223-s001.pdf [file oncotarget-07-67223-s001.pdf]

## **Methionine deprivation suppresses triple-negative breast cancer metastasis *in vitro* and *in vivo***

### **SUPPLEMENTARY TABLE**

**Supplementary Table S1: A10021B and Modified Diets.** A10021B and Modified Diets were obtained from Central Lab Animal. A10021B is based on Hirakawa et al [14].

**See Supplementary File 1**
